# Supplementary figures and images for: Barriers to Psychosocial Services Use For Latina Versus Non-Latina White Breast Cancer Survivors
Source: Atypon-hosted journal article supplement (doi:10.1176/appi.psychotherapy.20190036), 2020-10-08

**Figure 1.** CONSORT diagram with cohort selection.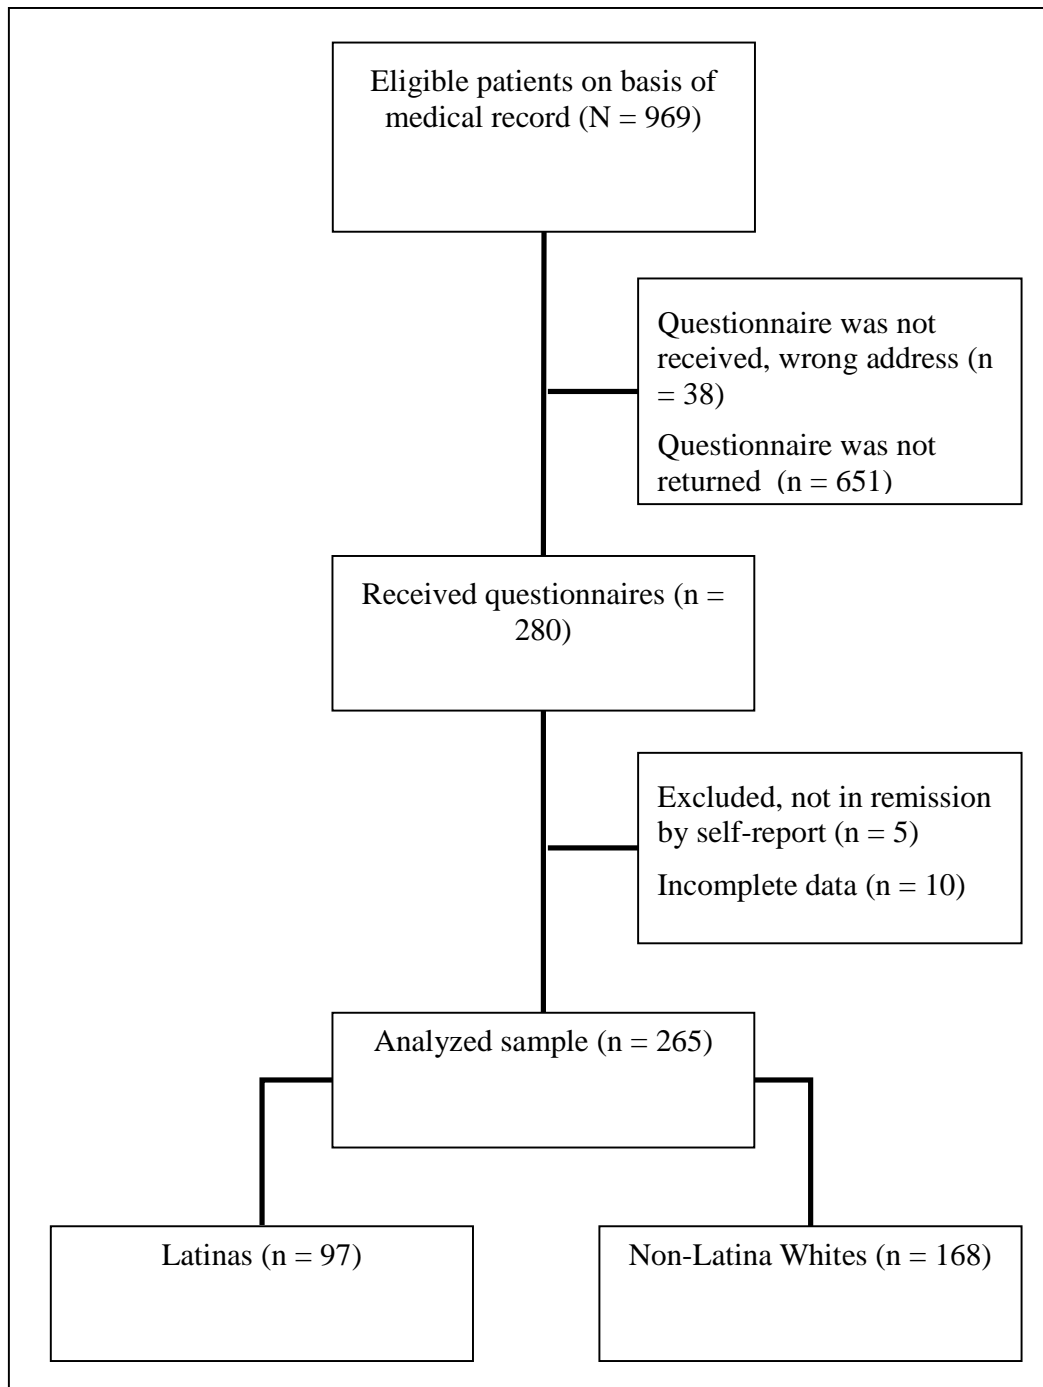

Supplement: appi.psychotherapy.20190036.ds001.pdf [file appi.psychotherapy.20190036.ds001.pdf]
